RESEARCH ARTICLE

# Evaluation of limited irrigation strategies to improve water use efficiency and wheat yield in the North China Plain

Di Zhang<sup>1,2</sup>, Ruiqi Li<sup>1</sup>, William D. Batchelor<sup>2\*</sup>, Hui Ju<sup>2,3</sup>, Yanming Li<sup>1\*</sup>

**1** College of Agronomy, Hebei Agricultural University, Baoding, Hebei, China, **2** Biosystems Engineering Department, Auburn University, Auburn, AL, United States of America, **3** Institute of Environment and Sustainable Development in Agriculture, Chinese Academy of Agricultural Science, Beijing, China

\* [liy315@126.com](mailto:liy315@126.com) (YL); [wdb0007@auburn.edu](mailto:wdb0007@auburn.edu) (WDB)

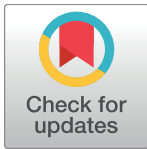

**OPEN ACCESS**

**Citation:** Zhang D, Li R, Batchelor WD, Ju H, Li Y (2018) Evaluation of limited irrigation strategies to improve water use efficiency and wheat yield in the North China Plain. *PLoS ONE* 13(1): e0189989. <https://doi.org/10.1371/journal.pone.0189989>

**Editor:** Aimin Zhang, Institute of Genetics and Developmental Biology Chinese Academy of Sciences, CHINA

**Received:** May 9, 2017

**Accepted:** December 6, 2017

**Published:** January 25, 2018

**Copyright:** This is an open access article, free of all copyright, and may be freely reproduced, distributed, transmitted, modified, built upon, or otherwise used by anyone for any lawful purpose. The work is made available under the [Creative Commons CC0](https://creativecommons.org/licenses/by/4.0/) public domain dedication.

**Data Availability Statement:** The data underlying this study belong to the China Meteorological Administration and are accessible using the following link: <http://data.cma.cn/data/cdcdetail/dataCode/A.0029.0001.html>. Interested researchers can access the data set by registering online with the China Meteorological Administration. The authors did not have special access privileges.

**Funding:** This work was supported by China Agriculture Research System (CARS-3-2-3) to YL,

## Abstract

The North China Plain is one of the most important grain production regions in China, but is facing serious water shortages. To achieve a balance between water use and the need for food self-sufficiency, new water efficient irrigation strategies need to be developed that balance water use with farmer net return. The Crop Environment Resource Synthesis Wheat (CERES-Wheat model) was calibrated and evaluated with two years of data which consisted of 3–4 irrigation treatments, and the model was used to investigate long-term winter wheat productivity and water use from irrigation management in the North China Plain. The calibrated model simulated accurately above-ground biomass, grain yield and evapotranspiration of winter wheat in response to irrigation management. The calibrated model was then run using weather data from 1994–2016 in order to evaluate different irrigation strategies. The simulated results using historical weather data showed that grain yield and water use was sensitive to different irrigation strategies including amounts and dates of irrigation applications. The model simulated the highest yield when irrigation was applied at jointing (T9) in normal and dry rainfall years, and gave the highest simulated yields for irrigation at double ridge (T8) in wet years. A single simulated irrigation at jointing (T9) produced yields that were 88% compared to using a double irrigation treatment at T1 and T9 in wet years, 86% of that in normal years, and 91% of that in dry years. A single irrigation at jointing or double ridge produced higher water use efficiency because it obtained higher evapotranspiration. The simulated farmer irrigation practices produced the highest yield and net income. When the cost of water was taken into account, limited irrigation was found to be more profitable based on assumptions about future water costs. In order to increase farmer income, a subsidy will likely be needed to compensate farmers for yield reductions due to water savings. These results showed that there is a cost to the farmer for water conservation, but limiting irrigation to a single irrigation at jointing would minimize impact on farmer net return in North China Plain.

by National Science and Technology Support Program of China “The science and technology engineering for grain bumper harvest” (2011BAD16B08, 2012BAD04B06, 2013BAD07B05) to YL, by the National Institute of Food and Agriculture, US Department of Agriculture, Hatch project under ALA014-1-16016 to WDB, by National Natural Science Foundation of China (41675115) to HJ, and by the China Scholarship Council to DZ. The funders had no role in study design, data collection and analysis, decision to publish, or preparation of the manuscript.

**Competing interests:** The authors have declared that no competing interests exist.

## Introduction

The North China Plain (NCP) is one of the most important grain production regions in China, accounting for 56% the wheat grain production of China [1]. Annual precipitation is unevenly distributed both within and across seasons, which does not satisfy seasonal water demand for winter wheat [2]. For this reason, irrigation is required to achieve high grain yields for winter wheat in NCP. Because there are no reliable surface water sources for irrigation, groundwater is the primary source of water for irrigation. However, groundwater use exceeds the recharge rates, and the groundwater levels are dropping, causing a range of adverse environmental and economic impacts [3,4]. It was reported that one way to alleviate groundwater depletion is to decrease sown area of winter wheat and irrigation amount [3,5]. However, this would threaten national food security if winter wheat production was significantly reduced in NCP [6]. The scale of the problem is such that it is now imperative to find ways to reduce agricultural water use without affecting food supplies [7]. To achieve the trade-offs between alleviating water resource over-exploitation and food self-sufficiency, a greater adoption of water-efficient production systems appears to be the best solution [8,9].

In agricultural production in NCP, farmers usually irrigate three to five times via flood irrigation over the winter wheat growing season. Previous studies have shown that double irrigation, one at jointing and the second at heading or anthesis results in higher water use efficiency and yield [10]. Nevertheless, groundwater use is not sustainable even under optimized irrigation regimes. To stabilize the groundwater table, new irrigation strategies must be developed that will maintain yield and increase water use efficiency (WUE) [11].

Reducing the frequency of irrigations and the amount of water applied would help alleviate groundwater depletion. This strategy is referred to as deficit irrigation. Deficit irrigation is defined as the application of water below full crop water requirements. Moderate water deficit during grain filling increases mobilization of assimilate stored in vegetative tissues and grain, resulting in greater grain yield and WUE. Supplemental irrigation at early growth stages enables roots to grow deeper into soil layers, which enhances uptake of soil-stored water from the deeper subsoil layers [12]. Thus, deficit irrigation promotes vegetative growth and more efficient soil water use during the reproductive stage [13]. Recommendations for limited irrigation differ. Some research reported that irrigation applied before planting under limiting condition increases yield [14,15]. Other studies suggest that one irrigation at jointing can increase grain yield and maximize WUE [11,12]. Some studies have tested irrigation strategies based on pan evaporation or monitoring soil water levels. These strategies recommended irrigation amounts of 50–100 mm divided into applications of 20–40 mm each [16,17]. However, in practice it is still difficult for farmers to use such criteria. Thus it is important to clarify how to schedule supplemental irrigation to minimize yield loss under a limited water supply.

Agricultural systems modeling has proven to be an effective tool to investigate the potential impacts of climate variability and management strategies on crop productivity, resource use efficiencies and environmental impacts of farming systems [18,19]. In recent years, the Decision Support System for Agrotechnology Transfer (DSSAT) model [20,21] has been successfully used to analyze irrigation strategies for wheat in China [22–28]. However, these studies did not evaluate how the yield of winter wheat and soil water balances are affected by water limiting irrigation strategies to conserve water over the long term.

Water pricing plays a significant role in coordinating water use and benefits increases [29]. In the NCP, irrigation water is currently free, and farmers currently only pay the power costs associated with pumping groundwater [30]. Thus farmers are not charged volumetric prices and so are not encouraged to conserve water [31]. In China, much research has been conducted to assess water rights and irrigation price policy [32–36]. However, there is limited

research available to evaluate the impact of potential water cost policies on crop productivity under deficit irrigation strategies.

The objectives of this study were: 1) to calibrate the DSSAT-CERES-Wheat model to accurately simulate winter wheat growth and yield in the North China Plain under limiting irrigation condition; 2) to simulate winter wheat grain and biomass yields, evapotranspiration, and water use efficiency responses to different irrigation scheduling practices using long-term weather data; 3) evaluate the impact of water price on economic return under different irrigation strategies.

## Materials and methods

### Study site

The study was carried out in Gaocheng District, Shijiazhuang City, Hebei Province, China, which is in the middle of NCP. The typical cropping system is a winter wheat and summer maize double cropping system. The area is semi-arid with a monsoon climate, with average annual temperature of 11–14°C. The average precipitation of winter wheat is 108.7 mm from 1994 to 2015 (Fig 1). More than 70% of the precipitation occurs from July to September [37]. Only 20–30% of the precipitation occurs from October to early June during the wheat growing season. The soil type was clay-loam.

### Field management and experiment data

Field experiments were conducted in 2013–2014 (experiment 1) and 2014–2015 (experiment 2). Experiment 1 (Table 1) consisted of three irrigation treatments, including normal farmer practice (100 mm applied at jointing and 100 mm at anthesis with 240 N kg ha<sup>-1</sup>), deficit irrigation level 1 (60 mm applied at jointing and 60 mm at anthesis with 195 N kg ha<sup>-1</sup>), deficit irrigation level 2 (45 mm applied at jointing and 30 mm applied at anthesis and 30 mm applied at

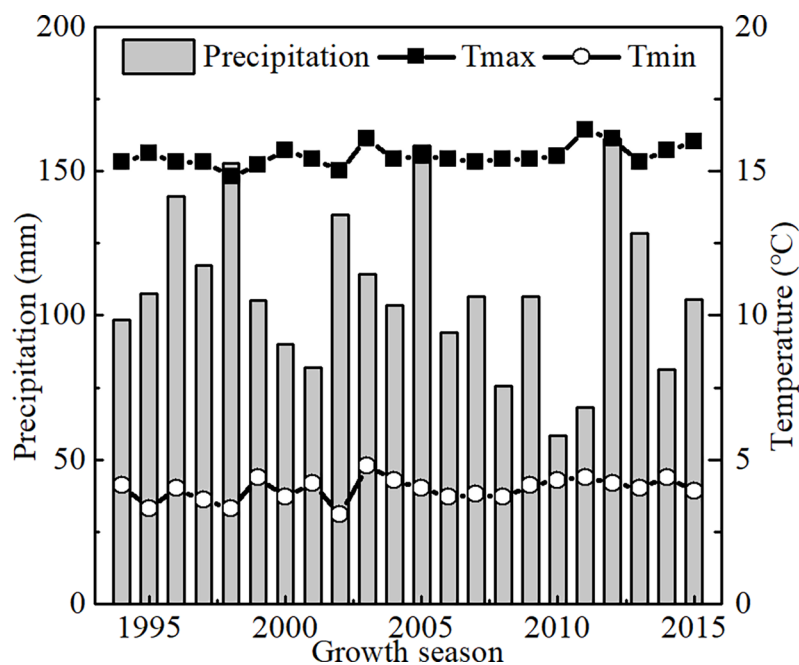

**Fig 1. Distribution of precipitation, maximum (Tmax) and minimum temperature (Tmin) at Gaocheng, over 22 growth season.**

<https://doi.org/10.1371/journal.pone.0189989.g001>

**Table 1. Water and nitrogen treatments in the experiments conducted at Gaocheng, China (2013–2015).**

|              | Total irrigation amount (mm) | Jointing Irrigation (mm) | Anthesis Irrigation (mm) | Grain Filling Irrigation (mm) | N application (N kg ha <sup>-1</sup> ) |
|--------------|------------------------------|--------------------------|--------------------------|-------------------------------|----------------------------------------|
| Experiment 1 | 200                          | 100                      | 100                      | 0                             | 240                                    |
|              | 120                          | 60                       | 60                       | 0                             | 195                                    |
|              | 105                          | 45                       | 30                       | 30                            | 195                                    |
| Experiment 2 | 67.5                         | 67.5                     | 0                        | 0                             | 120, 180, 240                          |
|              | 67.5                         | 37.5                     | 30                       | 0                             | 120, 180, 240                          |
|              | 67.5                         | 37.5                     | 15                       | 15                            | 120, 180, 240                          |
|              | 135                          | 67.5                     | 67.5                     | 0                             | 120, 180, 240                          |

<https://doi.org/10.1371/journal.pone.0189989.t001>

grain filling with 195 N kg ha<sup>-1</sup>). Experiment 2 was set up as a split-plot design with four irrigation treatments in the main plots and three nitrogen levels in the sub-plots. A local winter wheat cultivar, Shimai 18 was planted, and the plot size was 7 m × 10 m with three replications in all experiments. In experiment 1, the winter wheat was sown on October 8 with a plant density of 300 plants m<sup>-2</sup>. In experiment 2, winter wheat was sown on October 9 with a plant density of 317 plants m<sup>-2</sup>. Weeds, insect pests, and diseases were properly controlled and the crops were not limited by other nutrients. Thirty plants were selected to determine the above ground dry matter accumulation at pre-winter, double-ridge, jointing, booting, anthesis, grain filling and maturity in all experiments. The leaf area index (LAI) was determined from the same samples as used for dry matter weight. Leaf area was calculated as leaf length × leaf width × 0.83. All plant samples were oven dried at 105 °C for 30 min, then dried at 75 °C for 72 h until reaching constant weight. At maturity, 2 m<sup>2</sup> of plants in each plot was harvested for the determination of grain yield.

### CERES-Wheat model calibration and evaluation

The DSSAT-CERES-Wheat model version 4.6[20,21] was used to simulate above-ground biomass, grain yield, and evapotranspiration at the study site. The model requires daily weather data, soil profile characteristics, crop management data, and genotype coefficients as general inputs. Daily weather data from 1994 to 2016 including daily average, maximum and minimum temperature, precipitation, and sunshine hours were obtained from the weather station located in Gaocheng, China. Daily solar radiation was calculated using daily sunshine hours using the Weatherman software provided with DSSAT 4.6. The data of Yang et al. [22] were used to establish soil profile characteristics including lower limit, drained upper limit and saturated water holding capacity. The cultivar coefficients required to run the DSSAT-Wheat model were calibrated with field observations of biomass obtained in the 2013–2014 experiments. The cultivar coefficients required to simulate crop growth are shown in Table 2. For

**Table 2. Genetic coefficients calibrated for the 2013–2014 and 2014–2015 seasons.**

| Genetic coefficient | Definition                                                                   | Calibrated values |
|---------------------|------------------------------------------------------------------------------|-------------------|
| P1V                 | Days, optimum vernalizing temperature, required for vernalization            | 45                |
| P1D                 | Photoperiod response (% reduction in rate/10 h drop in pp)                   | 68                |
| P5                  | Grain filling (excluding lag) phase duration (°C day)                        | 800               |
| G1                  | Kernel number per unit canopy weight at anthesis (g)                         | 31                |
| G2                  | Standard kernel size under optimum conditions (mg)                           | 35                |
| G3                  | Standard, non-stressed mature tiller weight (including grain) (g dry weight) | 1.4               |
| PHINT               | Interval between successive leaf tip appearances (°C day)                    | 100               |

<https://doi.org/10.1371/journal.pone.0189989.t002>

the remaining growth and yield coefficients, an iterative procedure was used to obtain a close match between simulated and measured leaf area index (LAI), biomass and grain yield. Following calibration, the model was evaluated using field experiment 2. To quantify the goodness of fit of the model, two common statistical indicators were used: root mean square errors (RMSE), and coefficient of determination ( $R^2$ ).

$$RMSE = \sqrt{\frac{\sum_{i=1}^n (S_i - M_i)^2}{n}}$$

$$R^2 = \frac{[\sum_{i=1}^n (M_i - M_{avg})(S_i - S_{avg})]^2}{\sum_{i=1}^n (M_i - M_{avg})^2 \sum_{i=1}^n (S_i - S_{avg})^2}$$

Where  $M_i$  and  $S_i$  are the observed and simulated values,  $M_{avg}$  and  $S_{avg}$  are the mean observed and simulated values, respectively;  $n$  is the number of samples.

### Evaluation of long-term irrigation strategies

The genetic coefficients calibrated (2013 and 2014) and evaluated (2014 and 2015) were used in the DSSAT-CERES-Wheat model (Version 4.6) to simulate winter wheat biomass and grain yield, evapotranspiration and water use efficiency in response to different irrigation schedules using historical weather data from 1994–2016. The irrigation schedules that were evaluated are shown in Table 3. The fertilizer strategy used in all simulations was 120 N kg ha<sup>-1</sup>, 150 P<sub>2</sub>O<sub>5</sub> kg ha<sup>-1</sup>, 100 K<sub>2</sub>O kg ha<sup>-1</sup> applied at sowing and 120 N kg ha<sup>-1</sup> was applied at jointing. Since inter-annual variation of precipitation varies strongly in local areas, the rain fall datasets were classified into three categories. Wet year ( $n = 6$ ), normal year ( $n = 9$ ) and dry year ( $n = 7$ ) were years with percentage of deviation of averages above 10%, between -10% and 10%, and below -10%, respectively [38].

Water use efficiency was calculated as the ratio of grain yield (kg ha<sup>-1</sup>) to evapotranspiration (mm). Net water use was described by consumption of groundwater. The meaning of a negative use is that storage in the aquifer has been dropping. The net water use was calculated using the following equation [39]:

$$NWU = D - I$$

Where,  $D$  = groundwater recharge, mm and  $I$  = irrigation pumping from groundwater, mm.

Table 3. Irrigation schedules simulated with the CERES-Wheat model.

| Treatment | Sowing, mm | Double ridge, mm | Jointing, mm | Anthesis, mm | Grain filling, mm | Total, mm |
|-----------|------------|------------------|--------------|--------------|-------------------|-----------|
| T1        |            |                  | 70           | 70           |                   | 140       |
| T2        |            |                  | 30           | 30           |                   | 60        |
| T3        |            |                  | 30           | 30           | 30                | 90        |
| T4        |            | 30               | 30           | 30           |                   | 90        |
| T5        |            | 30               | 30           | 30           | 30                | 120       |
| T6        |            |                  | 70           | 30           |                   | 100       |
| T7        | 70         |                  |              |              |                   | 70        |
| T8        |            | 70               |              |              |                   | 70        |
| T9        |            |                  | 70           |              |                   | 70        |
| T10       |            |                  |              | 70           |                   | 70        |

<https://doi.org/10.1371/journal.pone.0189989.t003>

The marginal net return (MNR, \$ ha<sup>-1</sup>) and relative marginal net return (RMNR, \$ mm<sup>-1</sup> irrigation water) were computed for each scenario by the following equations:

$$MNR = (Y_I - Y_0) \times Price - Cost$$

$$RMNR = \frac{MNR}{\text{irrigation amount}}$$

Where  $Y_I$  (kg ha<sup>-1</sup>) is the grain yield from treatments with irrigation,  $Y_0$  (kg ha<sup>-1</sup>) is the grain yield from treatment without irrigation, Price is the wheat grain price of 0.36 \$ kg<sup>-1</sup> and Cost is the sum of all fixed costs (\$ ha<sup>-1</sup>).

## Results

### Model calibration and evaluation

The genetic coefficients for the CERES-Wheat model were calibrated to accurately simulate winter wheat growth and yield response to irrigation management experiments conducted in the North China Plain. The genetic coefficients for winter wheat that were obtained by fitting the model simulation to observed biomass data are shown in Table 2. The data for 2013–2014 were chosen to calibrate the model (Fig 2A and 2C). Biomass simulations of winter wheat

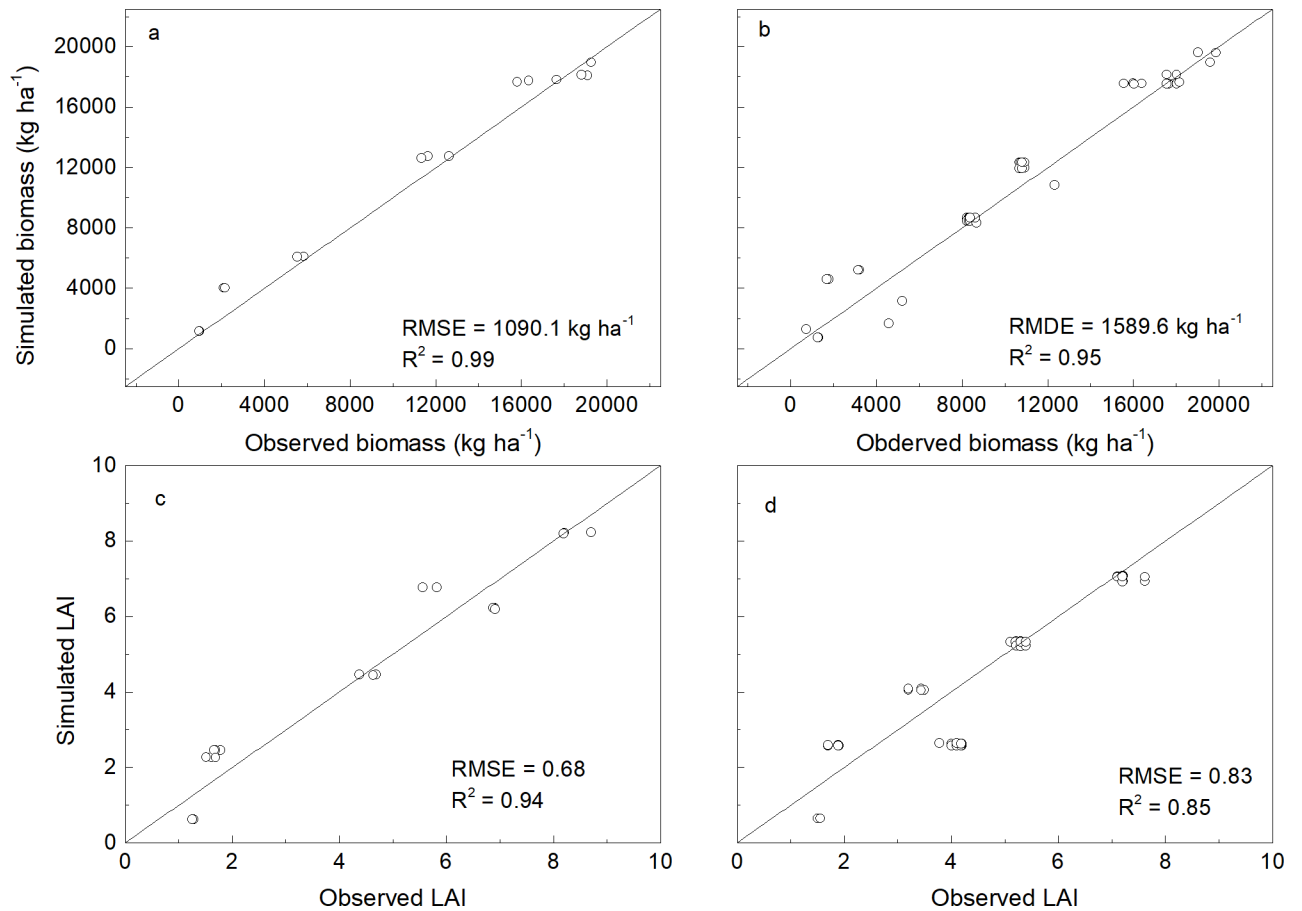

**Fig 2. Comparisons of measured and observed above-ground biomass (a for 2013–2014 and b for 2014–2015) and LAI (c for 2013–2014 and d for 2014–2015).** a and c were used to calibrate the model, b and d were used to validate the model.

<https://doi.org/10.1371/journal.pone.0189989.g002>

agreed well with observations with an  $R^2$  of 0.99 and RMSE of  $1090.1 \text{ kg ha}^{-1}$  across different irrigation treatments. The simulated leaf area index also agreed well with observed measurements with an  $R^2$  of 0.94 and RMSE of  $0.68 \text{ m}^2 \text{ m}^{-2}$ . Thus, the model did an excellent job in describing the yield response to different irrigation treatments for the calibration and evaluation treatments and years.

Once calibrated, the model was evaluated for LAI and above-ground biomass in 2014–2015, and grain yields and evapotranspiration in 2013–2015. The model gave a good prediction of the grain yield and evapotranspiration (ET) with an  $R^2$  of 0.82 and an RMSE value of  $529.1 \text{ kg ha}^{-1}$  and  $32.5 \text{ mm}$  of ET, respectively (Fig 3A and 3B). In addition, simulated above-ground biomass agreed well with observations with an  $R^2$  of 0.95 and  $1589.6 \text{ kg ha}^{-1}$ . Acceptable performance of the LAI prediction was indicated by the  $R^2$  of 0.85 and RMSE of  $0.83 \text{ m}^2 \text{ m}^{-2}$ . These results indicated that the model was able to accurately simulate above-ground biomass, grain yield and evapotranspiration of winter wheat in response to different irrigation management treatments in the North China Plains.

### Grain and biomass yield in response to different irrigation strategies and precipitation amounts

The calibrated and evaluated CERES-Wheat model was used to investigate winter wheat biomass and grain yield, evapotranspiration, and WUE responses to different irrigation scheduling practices using historical weather data from 1994–2016 for the North China Plain (Figs 4 and 5). Simulated grain yield was significantly affected by the timing and amount of irrigation across the simulation years (Fig 4). Simulated double irrigation at jointing and anthesis (T1) gave the highest simulated yield for wet, normal and dry years. Four irrigations (T5) and double irrigation (T1) gave no differences in simulated yield. Single irrigation at jointing (T9), with half of the irrigation amount of the double irrigation treatment (T1), gave 88% of the simulated yield for the double irrigation treatment (T1) grain yield in wet years, 86% of that in normal years, and 91% of that in dry years. Compared with reduced irrigation at jointing and anthesis (T2), a single irrigation at jointing (T9) increased yield by 13% in wet years, 15% in normal years, and 19% in dry years. A single irrigation at jointing (T9, 70 mm) produced higher simulated grain yield than triple irrigation treatments (T3 and T4, 90 mm) in normal and dry years. The highest simulated yield was found for irrigation at jointing (T9) in normal

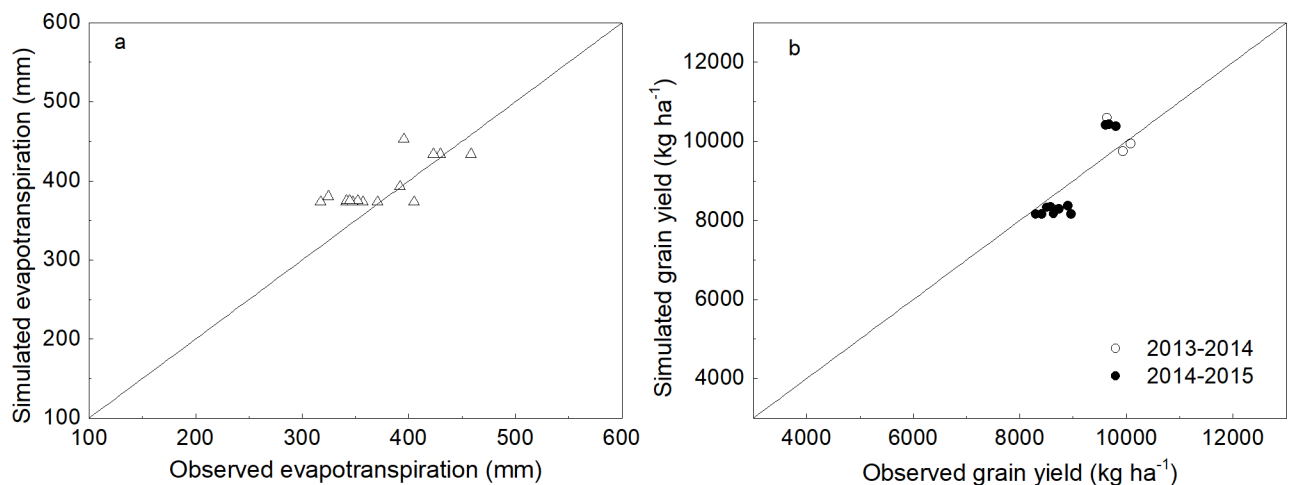

Fig 3. Validation results of the CERES-wheat model for evapotranspiration (a) and grain yield (b).

<https://doi.org/10.1371/journal.pone.0189989.g003>

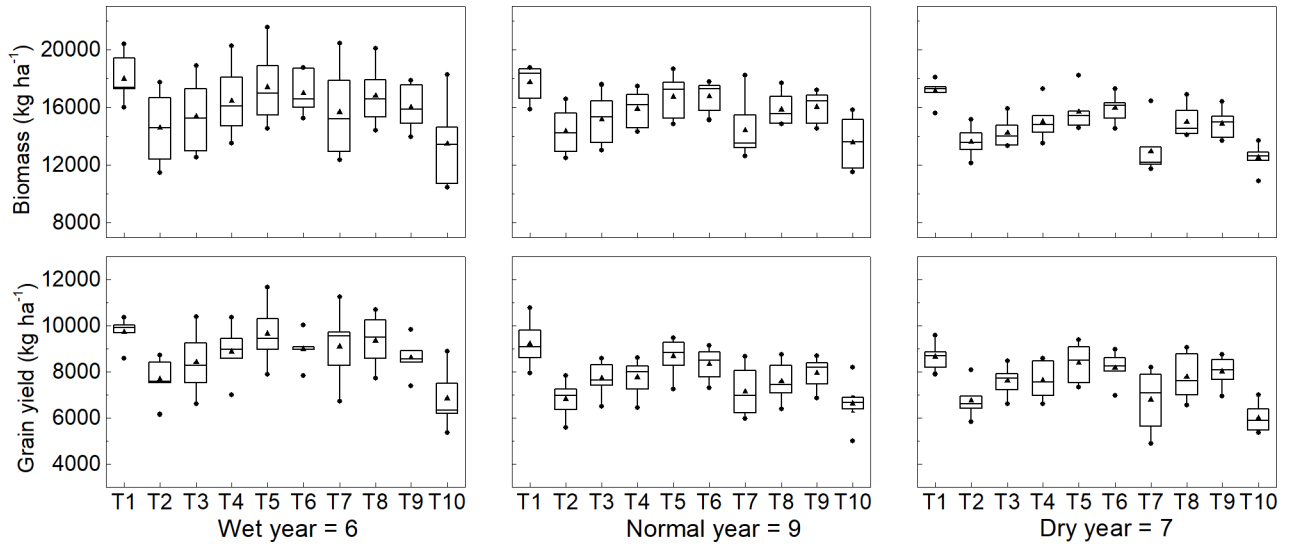

**Fig 4. Simulated grain and biomass yield for different irrigation treatments.** The triangle indicates the median. The circle indicates the 75 and 25 percent. The middle line indicates 50 percent.

<https://doi.org/10.1371/journal.pone.0189989.g004>

years and dry years, and for irrigation at the double ridge stage (T8) in wet years. Overall, this indicates that it is better to irrigate at critical stages rather than irrigate multiple times in low volumes. A single irrigation during early spring (double ridges or jointing) produced simulated yields that were not significantly different from double irrigation.

Similar to grain yield, simulated biomass yield was significantly affected by the timing and amount of irrigation across the simulation years. Single irrigation at jointing (T9) produced approximately 89% of the biomass yield compared to double irrigation (T1) across the simulation years, which is equal with that of triple irrigation at double ridge and jointing and anthesis (T4), and produced little higher biomass yield than triple irrigation at jointing and anthesis

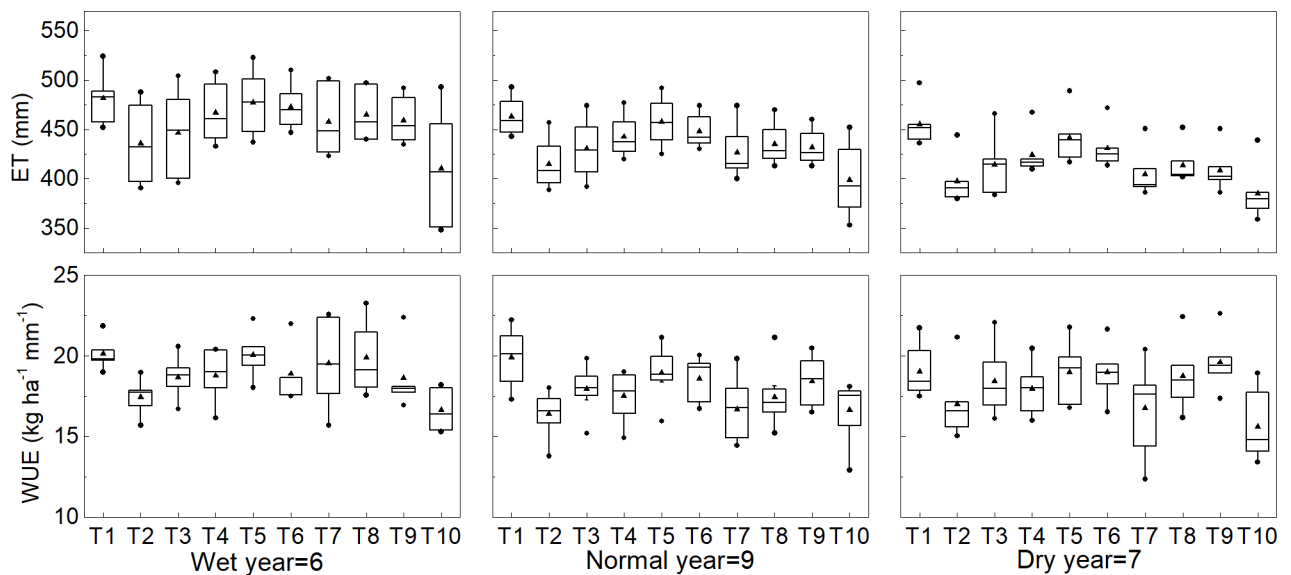

**Fig 5. Simulated evapotranspiration (ET) and water use efficiency (WUE) for different treatments.** The triangle indicates the median. The circle indicates the 75 and 25 percent. The middle line indicates 50 percent.

<https://doi.org/10.1371/journal.pone.0189989.g005>



and grain filling (T3). Moreover, a single irrigation at earlier spring growth stages (T8 and T9) produced higher biomass yield than single irrigation at sowing (T7) or anthesis (T10). It is suggested that single irrigation at earlier spring growth stages (double ridge or jointing) may be the optimal measures.

### Evapotranspiration and water use efficiency in response to different irrigation and precipitation

Evapotranspiration and water use efficiency for different years and irrigation treatments are shown in Fig 5. Simulated evapotranspiration reduced with the decreasing irrigation amount over the 22 year simulation period. Evapotranspiration also was affected by the timing of irrigation across the simulation years. Compared to the other single irrigation treatments, single irrigation at anthesis (T10) reduced the evapotranspiration over the simulation period. While deficit irrigation at jointing (T9) and that at double ridge (T8) exhibited no differences. When come to water use efficiency, it not only depended on irrigation amount and timing, but also on precipitation. The maximum mean water use efficiency was obtained for irrigation at jointing (T9) in dry years, followed by double irrigation treatment (T1) and four times irrigation (T5). While in normal years double irrigation resulted in the highest water use efficiency, followed by four times irrigation (T5) and single irrigation at jointing (T9). Under the condition of single irrigation in wet years, the water use efficiency was higher for single irrigation at double ridge (T8) than that for single irrigation at jointing (T9). The water use efficiency for double irrigation (T1) was not significantly different from that of single irrigation at jointing (T9) in wet years and normal years. Hence, during the winter wheat growing season, single irrigation should be applied at earlier spring growth stages (double ridge and jointing) to save water and to obtain high WUE and grain yield.

Fig 6 showed the water use efficiency response to grain yield, and grain yield response to evapotranspiration and transpiration and soil evaporation across simulation years. The response of water use efficiency to grain yield can be described using a quadratic equation ( $R^2 = 0.764$ ,  $P < 0.01$ ). The relationships indicated the importance of obtaining relatively high yield for attaining high WUE. The relationships between grain yield and evapotranspiration or transpiration were described by a quadratic equation. However, there was no relation between grain yield and soil evaporation. That suggested that attaining high grain yield should maintain high evapotranspiration, especially transpiration.

### Economic analysis

In traditional cultivation systems of high-yielding wheat, it was usual to irrigate more than 3 to 5 times during wheat growing seasons. So three times irrigation (pre-winter, jointing and anthesis) was selected as farmer irrigation with more sowing seeds, which was simulated over 22 years in this study. In the North China Plain the water is free. In this study the water price is power cost of pumping groundwater. Grain yield and economic costs for different irrigation regimes were shown in Table 4. With the increasing of irrigation amount, the yield and net income increased, but the net water use decreased. The farmer irrigation produced the highest yield and net income. Compared with farmer irrigation, recommending irrigation reduced grain yield by 5.25%, but the net income only decreased by 7.73% because of irrigation and seed costs decreasing. While limiting irrigation produced acceptable yield of 8244.3 kg ha<sup>-1</sup>, the net income of that produced 86.59% of farmer irrigation, the relative marginal return was 98.71% higher than farmer irrigation.

Marginal net return, net water use and relative marginal net return in response to irrigation amount were shown in Fig 7. With the increasing of irrigation amount, the marginal net

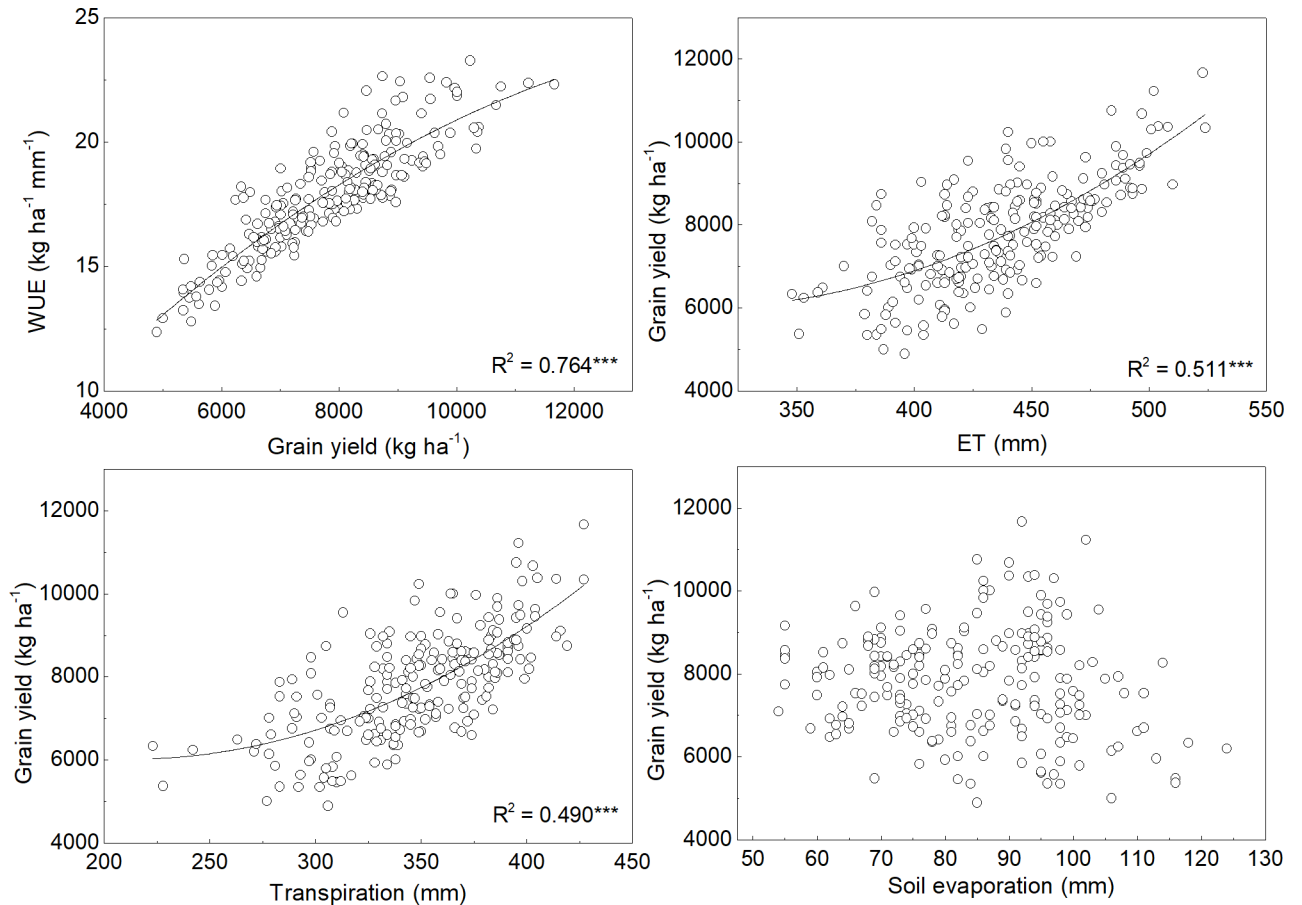

Fig 6. Grain yield response to evapotranspiration (ET) and transpiration and soil evaporation over 22 years.

<https://doi.org/10.1371/journal.pone.0189989.g006>

return increased, but the relative marginal net return and net water use decreased. The maximum relative marginal net return was 13.77 \$ ha<sup>-1</sup> mm<sup>-1</sup>. Take the maximum relative marginal net return as the standard rate, a range of water price rate was set out. So the cost of water was the sum of water power cost and water price rate which is the percentage of the maximum relative marginal net return. The marginal net return in response to water price rate was shown in Fig 8 under different irrigation strategies. The marginal net return was reduced as the rate of irrigation water price increased. The slope of farmer irrigation was higher than others, because

Table 4. Economic costs for different irrigation regimes over 22 seasons.

| Irrigation Regime       | Irrigation Amount mm | Yield kg ha <sup>-1</sup> | Cost \$ ha <sup>-1</sup> | Income \$ ha <sup>-1</sup> | MNR \$ ha <sup>-1</sup> | RMNR \$ ha <sup>-1</sup> mm <sup>-1</sup> | NWU mm |
|-------------------------|----------------------|---------------------------|--------------------------|----------------------------|-------------------------|-------------------------------------------|--------|
| Rainfed                 | 0                    | 5280.6                    | 673                      | 1228.0                     |                         |                                           | 29.4   |
| Limiting irrigation     | 80                   | 8244.3                    | 753                      | 2214.9                     | 986.9                   | 12.34                                     | -50.6  |
| Recommending irrigation | 140                  | 9021.1                    | 815                      | 2432.6                     | 1204.6                  | 8.60                                      | -110.6 |
| Farmer irrigation       | 210                  | 9520.9                    | 894                      | 2533.5                     | 1305.5                  | 6.21                                      | -180.6 |

US\$ = 6.6 Chinese Yuan. The prices for land preparing and sowing were: water power (\$0.08 m<sup>-3</sup>), plough (\$68 ha<sup>-1</sup>), rotary (\$45 ha<sup>-1</sup>), sowing wheat (\$56 ha<sup>-1</sup>), wheat seed (\$0.52 kg<sup>-1</sup>), herbicides and pesticides (\$23 ha<sup>-1</sup>), harvest (\$145 ha<sup>-1</sup>). Fertilizer prices: N (\$0.59 kg<sup>-1</sup>), P<sub>2</sub>O<sub>5</sub> (0.52 kg<sup>-1</sup>). Labor price: \$8 day<sup>-1</sup>.

<https://doi.org/10.1371/journal.pone.0189989.t004>

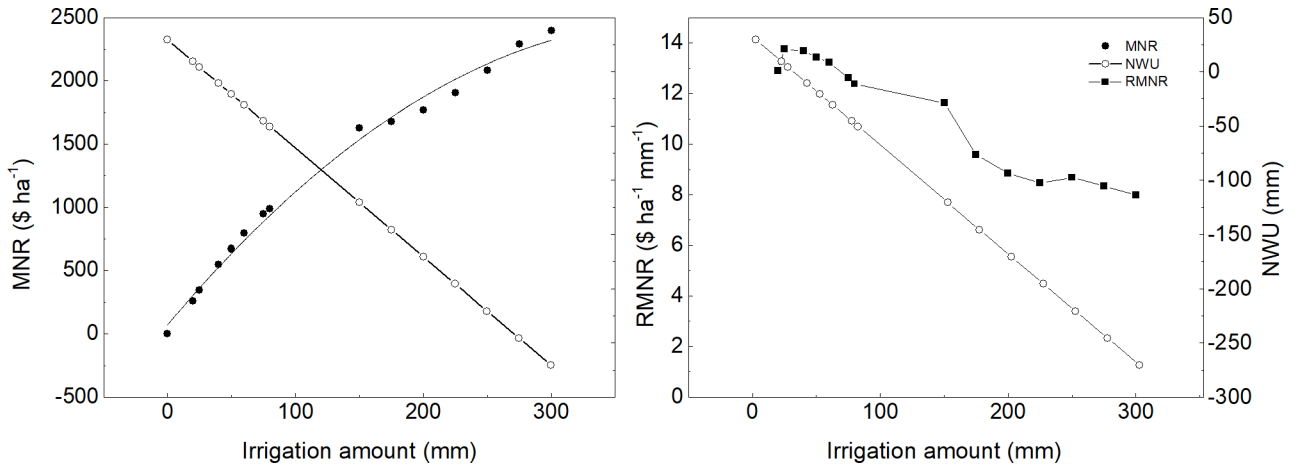

Fig 7. Simulated marginal net return (MNR), relative marginal net return (RMNR) and net water use (NWU) for different irrigation over 22 year seasons.

<https://doi.org/10.1371/journal.pone.0189989.g007>

of much more irrigation amount than others. When the rate was 7.33% of the maximum relative marginal net return, the marginal net return between recommending irrigation and farmer irrigation were equal, and both were higher than limiting irrigation. As water price rate was lower than 7.33%, the marginal net return of farmer irrigation was lower than that of recommending irrigation. The marginal net return of farmer irrigation was not lower than that of limiting irrigation until the rate increased to above 14.47%. At the rate of 26.4%, the marginal net return of both limiting irrigation and recommending irrigation was 696.5 \$ ha<sup>-1</sup>. The recommending irrigation produced lower marginal net return than limiting irrigation as the rate exceeds 26.4%.

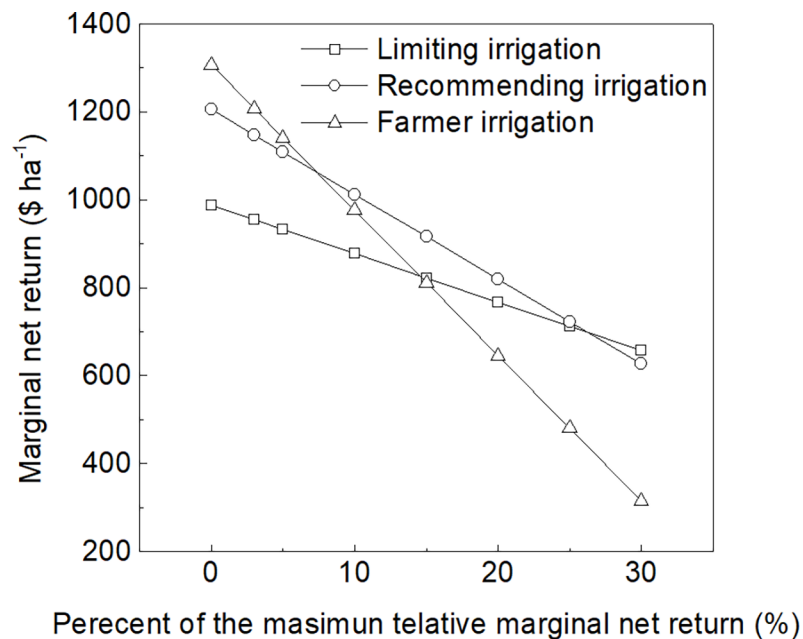

Fig 8. Simulated net return for different irrigation strategies over 22 seasons.

<https://doi.org/10.1371/journal.pone.0189989.g008>

## Discussion

Extensive studies showed that once the model was properly calibrated, it was able to predict the biomass growth, grain yield, crop water uptake in response to water supply, therefore it can be used to explore strategies for increasing water use efficiencies in NCP [18]. In this paper, the calibrated and validated DSSAT-Wheat model was used to investigate winter wheat growth and soil water balance in response to different irrigation schedules over 22 years. The results of this study were able to determine the quantitative analysis of the winter wheat total productivity in response to changes in water availability for irrigation schedules. The results of this study showed that reduction of irrigation amount will decrease the total productivity. The results were similar to those of Zhao et al. [18]. However, there was a possibility of reducing irrigation amount as well as getting acceptable grain yield and higher WUE with reasonable irrigation schedule.

The preface of this paper indicates that there is a conflict of optimum irrigation schedule. This research showed that intensive irrigation at critical stage was better than multiple irrigation with low amount each time, because the appropriate soil water and higher root density under later conditions was in the surface soil layer [40]. Taking previous researches into consideration, single irrigation should be applied at pre-winter or from recovering to jointing or anthesis of winter wheat. This research also showed that single irrigation at the stages from double ridge to jointing produced higher grain yield than others. Single pre-winter irrigation encouraged root growth at topsoil layer, which restricted water use from deep soil layers [41]. Applying pre-winter irrigation increased soil evaporation from winter to spring. Thus, there was a serious drought stress after anthesis under single pre-winter irrigation. Single irrigation at anthesis cannot alleviate severe drought at spring, which inhibited the tiller emergence. Moreover, dry winds at the end of the growing season can dehydrate wheat very rapidly and reduced the positive effect of applying anthesis irrigation on grain yield. Overall, single irrigation should be applied at early spring growth stages.

Extensive research showed the relationships between grain yield and evapotranspiration. Some research suggested that grain yield increased linearly with evapotranspiration [42]. However, other studies found a quadratic equation between grain yield and evapotranspiration [43–47]. Moreover, Man et al. [48] found that winter wheat grain yield decreased linearly with increasing evapotranspiration. Kang et al. [47] reported that grain yield required a minimum evapotranspiration of 152 mm for winter wheat. The grain yield response to evapotranspiration varied considerably due to differences in soil moisture contents and irrigation scheduling between seasons. This study showed that the relationships between water use efficiency and grain yield or between grain yield and evapotranspiration or transpiration was described by a quadratic equation. And the grain yield increased rapidly as evapotranspiration and transpiration exceeded a certain value. This indicated that obtaining higher yield necessary to maintain a quantity of evapotranspiration and transpiration. Overall, it highlights the importance of supplement irrigation to limited duration and severity of drought stress for attaining relative high yield [49]. This research showed that single irrigation at earlier spring growth stages can obtain high evapotranspiration, and thus it produced higher water use efficiency. Xu et al. [12] reported that single irrigation at earlier spring growth stages could increase soil reservoir capacity to store more accessible rain-water in the soil during the summer season, thereby it increased annual water use.

This study showed that farmer irrigation produced higher income and marginal net return than limiting irrigation and recommending irrigation when there was no water price. Water pricing is a key component of currently agricultural water policy reforms in China, and reasonable pricing reform can improve water management [33]. This study found that the marginal net return of limiting irrigation was equal to that of farmer irrigation at rate of 14.47%,

and was equal to that of recommending irrigation at rate of 26.4%. If no subsidies are granted, the farmers would lose money due to the reform. The marginal net return of farmer irrigation and limiting irrigation respectively decrease 762.3 \$ ha<sup>-1</sup> and 290.73 \$ ha<sup>-1</sup> at rate of 26.4%. Zuo [50] reported that the acceptable cost of farmer due to water price reform was 253.27 \$ ha<sup>-1</sup>. Liu et al. [51] reported that the subsidy standard was 2.17 times as much as cost due to applying saving irrigation. According to this standard, total marginal net return of irrigation was 1387.5 \$ ha<sup>-1</sup>, which is little higher than that of farmer irrigation with no rate.

## Conclusions

Further reduction in irrigation times and amount of water is considered a trade-off to alleviate groundwater overexploitation in NCP. The DSSAT-Wheat model was able to simulate winter wheat development, yield and water balance very well after it was calibrated and validated by the field experimental database which was carried out in NCP. Simulation scenarios of winter wheat response to irrigation scheduling using 22 years of historical weather data showed that obtaining higher yield necessary to maintain a quantity of evapotranspiration and transpiration. Single irrigation at earlier spring growth stages produced a similar water use efficiency compared to recommending irrigation with higher grain yield. Water pricing reform can ensure extension of irrigation strategy in agricultural production. When the water pricing rate was 26.4% maximum value of relative marginal net return, limiting irrigation and recommending irrigation obtained same marginal net return. In order to increase farmer income, there should be subsidy due to applying water-saving irrigation.

## Supporting information

**S1 File. Effects of irrigation treatments on grain yield, biomass, evapotranspiration and transpiration and soil evaporation over 22 seasons.**

(PDF)

**S2 File.**

(DOCX)

## Acknowledgments

This work was supported by China Agriculture Research System (CARS-3-2-3), by National Science and Technology Support Program of China “The science and technology engineering for grain bumper harvest” (2011BAD16B08, 2012BAD04B06, 2013BAD07B05), by the National Institute of Food and Agriculture, U.S. Department of Agriculture, Hatch project under ALA014-1-16016, by National Natural Science Foundation of China (41675115) and by the China Scholarship Council.

## Author Contributions

**Conceptualization:** Di Zhang, William D. Batchelor, Yanming Li.

**Data curation:** Di Zhang, Ruiqi Li, William D. Batchelor.

**Formal analysis:** Di Zhang, William D. Batchelor, Hui Ju.

**Funding acquisition:** Di Zhang, Ruiqi Li, William D. Batchelor, Hui Ju, Yanming Li.

**Investigation:** Di Zhang, Ruiqi Li.

**Methodology:** William D. Batchelor.

**Project administration:** Ruiqi Li.

**Resources:** Ruiqi Li.

**Software:** Di Zhang, William D. Batchelor.

**Supervision:** Ruiqi Li, William D. Batchelor, Yanming Li.

**Validation:** William D. Batchelor.

**Visualization:** Di Zhang, William D. Batchelor, Hui Ju.

**Writing – original draft:** Di Zhang.

**Writing – review & editing:** William D. Batchelor, Yanming Li.

## References

1. Chinese Statistical Bureau. China Statistical Yearbook. Beijing: China Statistics Press. 2016. In Chinese.
2. Lu XH, Jin MG, van Genuchten MT, Wang BG. Groundwater Recharge at Five Representative Sites in the Hebei Plain, China. *Ground Water*. 2011; 49(2):286–294. <https://doi.org/10.1111/j.1745-6584.2009.00667.x> PMID: 20100294
3. Xu YQ, Mo XG, Cai YL, Li XB. Analysis on groundwater table drawdown by land use and the quest for sustainable water use in the Hebei Plain in China. *Agricultural Water Management*. 2005; 75(1):38–53.
4. Aeschbach-Hertig W, Gleeson T. Regional strategies for the accelerating global problem of groundwater depletion. *Nature Geoscience*. 2012; 5(12):853–861.
5. Wang X, Li XB, Xin LJ. Impact of the shrinking winter wheat sown area on agricultural water consumption in the Hebei Plain. *Journal of Geographical Sciences*. 2014; 24(2):313–330.
6. Zhang K, Zeng ZH, Zhao J, Wang XQ, Zhou J, Xue HS, et al. Impact of analysis of reduce the extraction of groundwater on wheat production in North China Plain. *Journal of Science and Technology*. 2016; 18(5):111–117.
7. Viala E. Water for food, water for life a comprehensive assessment of water management in agriculture. *Irrigation and Drainage Systems*. 2008; 22(1):127–129.
8. Wang X, Li XB, Fischer G, Sun LX, Tan MH, Xin LJ, et al. Impact of the changing area sown to winter wheat on crop water footprint in the North China Plain. *Ecological Indicators*. 2015; 57:100–109.
9. Yang H, Zehnder A. "Virtual water": An unfolding concept in integrated water resources management. *Water Resources Research*. 2007; 43(12):W12301. doi:12310.11029/12007WR006048.
10. Li QQ, Dong BD, Qiao YZ, Liu MY, Zhang JW. Root growth, available soil water, and water-use efficiency of winter wheat under different irrigation regimes applied at different growth stages in North China. *Agricultural Water Management*. 2010; 97(10):1676–1682.
11. Wang B, Zhang YH, Hao BZ, Xu XX, Zhao ZG, Wang ZM, et al. Grain yield and water use efficiency in extremely-late sown winter wheat cultivars under two irrigation regimes in the North China Plain. *Plos One*. 2016; 11(4). <http://dx.doi.org/10.1371/journal.pone.0153695>
12. Xu C, Tao H, Tian B, Gao Y, Ren J, Wang P. Limited-irrigation improves water use efficiency and soil reservoir capacity through regulating root and canopy growth of winter wheat. *Field Crops Research*. 2016; 196:268–275.
13. Zhang X, Wang Y, Sun H, Chen S, Shao L. Optimizing the yield of winter wheat by regulating water consumption during vegetative and reproductive stages under limited water supply. *Irrigation Science*. 2012; 31(5):1103–1112.
14. Li J, Inanaga S, Li Z, Eneji AE. Optimizing irrigation scheduling for winter wheat in the North China Plain. *Agricultural water management*. 2005; 76(1):8–23.
15. Li FM, Song QH, Liu HS, Li FR, Liu XL. Effects of pre-sowing irrigation and phosphorus application on water use and yield of spring wheat under semi-arid conditions. *Agricultural water management*. 2001; 49(3):173–183.
16. Wang D, Yu ZW, White PJ. The effect of supplemental irrigation after jointing on leaf senescence and grain filling in wheat. *Field Crops Research*. 2013; 151:35–44.
17. Liu H, Yu L, Luo Y, Wang X, Huang G. Responses of winter wheat (*Triticum aestivum* L.) evapotranspiration and yield to sprinkler irrigation regimes. *Agricultural Water Management*. 2011; 98(4):483–492.

18. Zhao ZG, Qin X, Wang EL, Carberry P, Zhang YH, Zhou SL, et al. Modelling to increase the eco-efficiency of a wheat-maize double cropping system. *Agriculture Ecosystems & Environment*. 2015; 210:36–46.
19. Batchelor WD, Basso B, Paz JO. Examples of strategies to analyze spatial and temporal yield variability using crop models. *European Journal of Agronomy*. 2002; 18(1–2):141–158.
20. Jones JW, Hoogenboom G, Porter CH, Boote KJ, Batchelor WD, Hunt L, et al. The DSSAT cropping system model. *European journal of agronomy*. 2003; 18(3):235–265.
21. Hoogenboom G, Jones J, Wilkens P, Porter C, Boote K, Hunt L, et al. Decision support system for agro-technology transfer (DSSAT) version 4.6. DSSAT Foundation, Prosser, Washington. 2015.
22. Yang YH, Watanabe M, Zhang XY, Zhang JQ, Wang QX, Hayashi S. Optimizing irrigation management for wheat to reduce groundwater depletion in the piedmont region of the Taihang Mountains in the North China Plain. *Agricultural Water Management*. 2006; 82(1–2):25–44.
23. Yang YH, Watanabe M, Zhang XY, Hao XH, Zhang JQ. Estimation of groundwater use by crop production simulated by DSSAT-wheat and DSSAT-maize models in the piedmont region of the North China Plain. *Hydrological Processes*. 2006; 20(13):2787–2802.
24. Fang Q, Ma L, Yu Q, Ahuja LR, Malone RW, Hoogenboom G. Irrigation strategies to improve the water use efficiency of wheat-maize double cropping systems in North China Plain. *Agricultural Water Management*. 2010; 97(8):1165–1174.
25. Yang YM, Yang YH, Moiwu JP, Hu YK. Estimation of irrigation requirement for sustainable water resources reallocation in North China. *Agricultural Water Management*. 2010; 97(11):1711–1721.
26. Wang SF, Li HL, Yang YH, Wang HJ, Yang YM, Jia YG. Using DSSAT Model to assess spring wheat and maize water use in the arid oasis of Northwest China. *Journal of Food Agriculture & Environment*. 2012; 10(1):911–918.
27. He JQ, Cai HJ, Bai JP. Irrigation scheduling based on CERES-Wheat model for spring wheat production in the Minqin Oasis in Northwest China. *Agricultural Water Management*. 2013; 128:19–31.
28. Hu YN, Liu YJ, Tang HJ, Xu YL, Pan J. Contribution of Drought to Potential Crop Yield Reduction in a Wheat-Maize Rotation Region in the North China Plain. *Journal of Integrative Agriculture*. 2014; 13(7):1509–1519.
29. Zhong S, Shen L, Sha JH, Okiyama M, Tokunaga S, Liu LT, et al. Assessing the water parallel pricing system against drought in China: a study based on a CGE model with multi-provincial Irrigation Water. *Water*. 2015; 7(7):3431–3465.
30. Meng QF, Sun QP, Chen XP, Cui ZL, Yue SC, Zhang FS, et al. Alternative cropping systems for sustainable water and nitrogen use in the North China Plain. *Agriculture Ecosystems & Environment*. 2012; 146(1):93–102.
31. Webber M, Barnett J, Finlayson B, Wang M. Pricing China's irrigation water. *Global Environmental Change-Human and Policy Dimensions*. 2008; 18(4):617–625.
32. Sun TH, Wang JX, Huang QQ, Li YR. Assessment of Water Rights and Irrigation Pricing Reforms in Heihe River Basin in China. *Water*. 2016; 8(8):333.
33. Liao YS, Giordano M, de Fraiture C. An empirical analysis of the impacts of irrigation pricing reforms in China. *Water Policy*. 2007; 9:45–60.
34. Wang JX, Zhang LJ, Huang JK. How could we realize a win-win strategy on irrigation price policy? Evaluation of a pilot reform project in Hebei Province, China. *Journal of Hydrology*. 2016; 539:379–391.
35. Mamitimin Y, Feike T, Seifert I, Doluschitz R. Irrigation in the Tarim Basin, China: farmers' response to changes in water pricing practices. *Environmental Earth Sciences*. 2015; 73(2):559–569.
36. Huang QQ, Rozelle S, Howitt R, Wang JX, Huang JK. Irrigation water demand and implications for water pricing policy in rural China. *Environment and Development Economics*. 2010; 15:293–319.
37. Fu GB, Charles SP, Yu JJ, Liu CM. Decadal climatic variability, trends, and future scenarios for the North China Plain. *Journal of Climate*. 2009; 22(8):2111–2123.
38. Standardization Administration of the People's Republic of China. Standard for Hydrological Information and Hydrological Forecasting. Standards Press of China. 2000. In Chinese.
39. Yang X, Chen Y, Pacenka S, Gao W, Zhang M, Sui P, et al. Recharge and groundwater use in the North China Plain for six irrigated crops for an eleven year period. *PloS one*. 2015; 10(1). <http://dx.doi.org/10.1371/journal.pone.0115269>.
40. Lv GH, Kang YH, Li L, Wan SQ. Effect of irrigation methods on root development and profile soil water uptake in winter wheat. *Irrigation Science*. 2010; 28(5):387–398.
41. Shao LW, Zhang XY, Sun HY, Chen SY, Wang YM. Yield and water use response of winter wheat to winter irrigation in the North China Plain. *Journal of Soil and Water Conservation*. 2011; 66(2):104–113.

42. Zhang KF, Bosch-Serra AD, Boixadera J, Thompson AJ. Investigation of water dynamics and the effect of evapotranspiration on grain yield of rainfed wheat and barley under a mediterranean environment: a modelling approach. *Plos One*. 2015; 10(6). <https://doi.org/10.1371/journal.pone.0131360>
43. Sun HY, Shen YJ, Yu QA, Flerchinger GN, Zhang YQ, Liu CM, et al. Effect of precipitation change on water balance and WUE of the winter wheat-summer maize rotation in the North China Plain. *Agricultural Water Management*. 2010; 97(8):1139–1145.
44. Wang JD, Gong SH, Xu D, Yu YD, Zhao YF. Impact of drip and level-basin irrigation on growth and yield of winter wheat in the North China Plain. *Irrigation Science*. 2013; 31(5):1025–1037.
45. Zhang YQ, Kendy E, Yu Q, Liu CM, Shen YJ, Sun HY. Effect of soil water deficit on evapotranspiration, crop yield, and water use efficiency in the North China Plain. *Agricultural Water Management*. 2004; 64(2):107–122.
46. Sun HY, Liu CM, Zhang XY, Shen YJ, Zhang YQ. Effects of irrigation on water balance, yield and WUE of winter wheat in the North China Plain. *Agricultural Water Management*. 2006; 85(1–2):211–218.
47. Kang SZ, Zhang L, Liang YL, Hu XT, Cai HJ, Gu BJ. Effects of limited irrigation on yield and water use efficiency of winter wheat in the Loess Plateau of China. *Agricultural Water Management*. 2002; 55(3):203–216.
48. Man JG, Yu JS, White PJ, Gu SB, Zhang YL, Guo QF, et al. Effects of supplemental irrigation with micro-sprinkling hoses on water distribution in soil and grain yield of winter wheat. *Field Crops Research*. 2014; 161:26–37.
49. Zhang HP, Oweis T. Water-yield relations and optimal irrigation scheduling of wheat in the Mediterranean region. *Agricultural Water Management*. 1999; 38(3):195–211.
50. Zuo ZY. Assessing the irrigation pricing reforms in Ningjing irrigation district, North China Plain. *Journal of Agrotechnical Economics* 2016(6):32–46. In Chinese.
51. Liu JD, Huang YX, Han WT. Study of subsidy standards on voluntarily adopting saving-water irrigation. *Journal of Agrotechnical Economics* 2012; 11:29–40. In Chinese.
